# Supplementary material for: Microwave-Assisted Regioselective Synthesis and 2D-NMR Studies of New 1,2,3-Triazole Compounds Derived from Acridone
Source: Hindawi journal article supplement (doi:10.1155/2021/5540173), 2021-04-09
Supplement: f1 [file 5540173.f1.docx]

Microwave assisted regioselective synthesis and 2D-NMR studies of new 1,2,3-triazole compounds derived from acridone

Mohammed Aarjanea*, Siham Slassia, Bouchra Tazib, Amina Aminea

a Laboratory of Chemistry/Biology Applied to the Environment, Faculty of Science, University Moulay Ismail, BP 11201 Zitoune, Meknes, Morocco.

b National School of Agriculture, Department of Basic Sciences, Meknes, Morocco.

**Supporting Information**

| General details | 2 |
| --- | --- |
| General procedure for the synthesis of 10‐(prop‐2‐yn‐1‐yl)acridone (1). | 2 |
| Characterization data for compounds 1a and 1b | 2 |
| General procedure for the synthesis of acridon-triazole derivatives (2a-h) | 3 |
| Characterization data for compounds 2a-h | 3 |
| IR, NMR and HRMS spectra of the isolated products. | 5 |

**General details**

All materials were purchased from commercial suppliers. The 1H & 13C NMR spectra was recorded with Bruker Avance 300. Mass spectrometric measurements were recorded using Exactive™ Plus Orbitrap Mass Spectrometer.IR spectra were recorded using JASCO FT-IR 4100 spectrophotometer. Microwave irradiation was carried out with CEM Discover™.

**Synthesis**

***10‐(prop‐2‐yn‐1‐yl)acridone (1)****.*

To a mixture of acridone (0.5 g, 2.5 mmol), potassium carbonate (0.55 g, 3 mmol) and TBAB ( 0.5 g, 2.5 mmol) in DMF (7 ml), propargyl bromide (0.4 g, 3.6 mmol) was added and the mixture was then irradiated for 10 min. Microwave irradiation power was set at 200 W maximum. After that, it was poured into water and the white yellow formed precipitate was recrystallized from methanol-DMF.

White yellow solid; yield: 75 %, mp = 206-208 °C. IR (KBr): 3208, 3010, 2210, 1638, 1598 cm-1. 1H NMR (300 MHz, DMSO-d6, 25°C, TMS): δ= 8.34 (d, J = 7.8 Hz,1H, Ar–H), 8.12 (s,1H, Ar–H), 7.87- 7.86 (m, 4H, Ar–H), 7.37-7.38 (m, 2H, Ar–H), 5.32 (s, 2H, CH2), 2.41 (s, 1H, CH), 2,38 (s, 3H, CH3). 13C NMR (75 MHz, DMSO-d6, 25°C, TMS) δ 177.18, 141.78, 134.76, 134.47, 127.78, 127.07, 123.37, 122.20, 118.44, 116.35, 79.12, 76. 16, 36.12, 20.18

**General procedure for the synthesis of acridon-triazole derivatives (2a-h).**

**Conventional method**

A mixture of 10‐(prop‐2‐yn‐1‐yl)acridone (0.23 g, 1 mmol), CuI (0.02 g, 1 mmol) and TEA (0.14 g, 1.2 mmol) were suspended in 10 mL DMF. To this mixture, aromatic azide (2 mmol) were added at room temperature, the reaction mixture was stirred at 80 °C for 4-8 h. After completion of the reaction, water (25 ml) was added and the mixture was extracted with chloroform, the organic layer was evaporated in high vacuum, and the obtained product was purified by recrystallization in DMF.

**Microwave-assisted method**

A mixture of 10‐(prop‐2‐yn‐1‐yl)acridone (0.23 g, 1 mmol), CuI (0.01 g, 0.5 mmol) and TEA (0.07 g, 0.6 mmol) were suspended in 10 mL of solvent in a glass vial equipped with a small magnetic stirring bar. To this, aromatic azide (2 mmol) was added and the vial was tightly sealed. The mixture was then irradiated for 10 min. Microwave irradiation power was set at 200 W maximum. After completion of the reaction, water (25 ml) was added and the mixture was extracted with chloroform, the organic layer was evaporated in high vacuum, and the obtained product was purified by recrystallization in DMF.

***10-((1-(o-Tolyl)-1H-1,2,3-triazol-4-yl)methyl)acridin-9(10H)-one (2a)***

Yellow solid; yield: 90 %, mp = 224-226 °C**.** IR (KBr): 3112, 3063, 1638, 1600, 1502 cm-1. 1H NMR (300 MHz, DMSO-d6, 25°C, TMS) δ 8.62 (s, 1H, CH-triazole), 8.40 (dd, J = 8.0, 1.7 Hz, 2H, Ar–H ), 8.05 (d, J = 8.8 Hz, 2H, Ar–H), 7.86 (ddd, J = 8.7, 6.9, 1.8 Hz, 2H, Ar–H), 7.57 – 7.34 (m, 6H, Ar–H), 5.91 (s, 2H, CH2), 2.11 (s, 3H, CH3). 13C NMR (75 MHz, DMSO-d6, 25°C, TMS) δ 176.68, 142.58, 141.91, 136.06, 134.14, 132.95, 131.29, 129.79, 126.90, 126.59, 125.91, 125.19, 121.76, 121.49, 116.39, 41.56, 17.31. MS (ESI) for C23H18N4O [M + H]+, calcd: 367.1511, found: 367.1511.

***4-(4-((9-Oxoacridin-10(9H)-yl)methyl)-1H-1,2,3-triazol-1-yl)benzoic acid (2b)***

Yellow solid; yield: 79 %, mp >300 °C**.** IR (KBr): 3397, 3112, 3063, 1702, 1638, 1600, 1502 cm-1. 1H NMR (300 MHz, DMSO-d6, 25°C, TMS) δ 8.95 (s, 1H, CH-triazole), 8.41 (dd, J = 8.0, 1.7 Hz, 2H, Ar–H), 8.08-7.95 (m, 6H, Ar–H), 7.87-7.81 (m, 2H, Ar–H), 7.41-7.36 (m, 2H, Ar–H), 5.92 (s, 2H, CH2). 13C NMR (75 MHz, DMSO-d6, 25°C, TMS) δ 176.73, 164.54, 144.17, 141.89, 139.29, 137.23, 134.24, 132.29, 131.06, 128.08, 126.63, 121.80, 121.68, 121.53, 119.88, 117.18, 116.24, 41.80. HRMS (ESI) for C23H16N4O3 [M + H]+, calcd: 397.1255, found: 397.1255.

***10-((1-(m-Tolyl)-1H-1,2,3-triazol-4-yl)methyl)acridin-9(10H)-one (2c)***

Yellow solid; yield: 85 %, mp >300 °C**.** IR (KBr): 3120, 3063, 1637, 1606, 1597, 1507 cm-1. 1H NMR (300 MHz, DMSO-d6, 25°C, TMS) δ 8.73 (s, 1H, CH-triazole), 8.40 (dd, J = 8.0, 1.7 Hz, 2H, Ar–H), 7,99 (d, J= 8,1 Hz, 2H, Ar–H), 7.83 (t, 2H, Ar–H), 7.70 (d, J = 7.2 Hz, 2H, Ar–H), 7.36 (d, J = 7.2 Hz, 4H, Ar–H), 5.86 (s, 2H, CH2), 2.36 (s, 3H, CH3). 13C NMR (75 MHz, DMSO-d6, 25°C, TMS) δ 177.14, 144.10, 142.51, 138.86, 134.62, 130.58, 127.15, 122.42, 121.94, 120.53, 116.65, 42.39, 20.96. MS (ESI) for C23H16N4O3 [M + H]+, calcd: 367.1401, found: 367.1404.

***2-(4-((9-Oxoacridin-10(9H)-yl)methyl)-1H-1,2,3-triazol-1-yl)benzoic acid (2d)***

Yellow solid; yield: 75 %, mp >300 °C**.** IR (KBr): 3405, 3109, 3053, 1700, 1639, 1602, 1500 cm-1. 1H NMR (300 MHz, DMSO-d6, 25°C, TMS) δ 8.93 (s, 1H, CH-triazole), 8.37 (dd, J = 8.0, 1.7 Hz, 2H, Ar–H), 8.04-7.98 (m, 3H, Ar–H), 7.69-7.62 (M, 5H, Ar–H), 7.34-7.26 (m, 2H, Ar–H), 5.84 (s, 2H, CH2). 13C NMR (75 MHz, DMSO-d6, 25°C, TMS) δ 176.85, 161.51, 144.90, 142.50, 140.10, 135.54, 132.97, 128.69, 125.56, 124.11, 121.80, 121.53, 119.87, 117.76, 116.24, 41.80. MS (ESI) for C23H16N4O3 [M + H]+, calcd: 397.1507, found: 397.1507.

***2-Methyl-10-((1-(o-tolyl)-1H-1,2,3-triazol-4-yl)methyl)acridin-9(10H)-one (2e)***

Yellow solid; yield: 89 %, mp >300 °C**.** IR (KBr): 3110, 3065, 1637, 1610, 1601, 1502 cm-1. 1H NMR (300 MHz, DMSO-d6, 25°C, TMS) δ 8.59 (s, 1H, CH-triazole), 8.38 (d, J = 7.9 Hz, 1H, Ar–H), 8.25 – 8.12 (m, 1H, Ar–H), 8.01 (dd, J = 19.3, 8.7 Hz, 2H, Ar–H), 7.83 (t, J = 7.9 Hz, 1H, Ar–H), 7.68 (d, J = 8.7 Hz, 1H, Ar–H), 7.58 – 7.25 (m, 5H, Ar–H), 5.89 (s, 2H, CH2), 2.46 (s, 3H, CH3), 2.10 (s, 3H, CH3). 13C NMR (75 MHz, DMSO-d6, 25°C, TMS) δ 176.50, 141.75, 140.03, 136.06, 135.43, 133.94, 132.94, 131.28, 130.68, 129.79, 126.89, 126.61, 125.90, 125.82, 125.13, 121.64, 121.21, 116.40, 116.24, 41.44, 20.18, 17.31. MS (ESI) for C24H20N4O [M + H]+, calcd: 381.1669, found: 381.1669.

***2-Methyl-4-(4-((9-oxoacridin-10(9H)-yl)methyl)-1H-1,2,3-triazol-1-yl)benzoic acid (2f)***

Yellow solid; yield: 82 %, mp >300 °C**.** IR (KBr): 3398, 3110, 3063, 1700, 1638, 1609, 1502 cm-1. 1H NMR (300 MHz, DMSO-d6, 25°C, TMS) δ 8.93 (s, 1H, CH-triazole), 8.40 (s, 1H, Ar–H), 8.14 (s, 1H, Ar–H), 8.04-7.95 (m, 5H, Ar–H), 7.87-7.82 (m, 2H, Ar–H), 7.37 (t, J = 7.4 Hz, 2H, Ar–H), 5.90 (s, 2H, CH2), 2.29 (s, 3H, CH3). 13C NMR (75 MHz, DMSO-d6, 25°C, TMS) δ 176.55, 164.99, 144.24, 141.72, 139.98, 139.27, 135.52, 134.03, 130.72, 126.64, 125.86, 121.68, 121.24, 116.25, 116.07, 41.65, 20.18. MS (ESI) for C24H18N4O3 [M + H]+, calcd: 411.1403, found: 411.1408.

***2-Methyl-10-((1-(m-tolyl)-1H-1,2,3-triazol-4-yl)methyl)acridin-9(10H)-one (2g)***

Yellow solid; yield: 81 %, mp >300 °C**.** IR (KBr): 3112, 3063, 1638, 1600, 1502 cm-1. 1H NMR (300 MHz, DMSO-d6, 25°C, TMS) δ 8,70(s, 1H, triazole), 8.33 (d, J = 7.2 Hz, 1H, Ar–H), 8.14 (s, 1H, Ar–H), 7,94-7.53 (m, 6H, Ar–H'), 7.33 (d, J = 7.2 Hz, 3H, Ar–H), 5.78 (s, 2H, CH2), 2,42 (s, 3H, CH3), 2.32 (s, 3H, CH3). 13C NMR (75 MHz, DMSO-d6, 25°C, TMS) δ 177.01, 144.22, 142.22, 140.49, 138.80, 135.99, 134.51, 131.17, 130.60, 127.11, 126.32, 122.14, 121.83, 121.70, 120.36, 116.81, 116.64, 42.67, 21.00, 20.68. MS (ESI) for C24H20N4O [M + H]+, calcd: 381.1669, found: 381.1660.

***2-(4-((2-Methyl-9-oxoacridin-10(9H)-yl)methyl)-1H-1,2,3-triazol-1-yl)benzoic acid (2h)***

Yellow solid; yield: 78 %, mp >300 °C**.** IR (KBr): 3400, 3121, 3052, 1704, 1640, 1605, 1501 cm-1. 1H NMR (300 MHz, DMSO-d6, 25°C, TMS) δ 8.92 (s, 1H, CH-triazole), 8.39 (d, J = 7.9 Hz, 1H, Ar–H), 8.15 (s, 1H, Ar–H), 7.96-7.87 (m, 2H, Ar–H), 7.69-7.61 (m, 5H, Ar–H), 7.31-7.26 (m, 2H, Ar–H), 5.81 (s, 2H, CH2), 2.44 (s, 3H, CH3). 13C NMR (75 MHz, DMSO-d6, 25°C, TMS) δ 176.01, 166.96, 142.46, 141.71, 140.56, 138.37, 136.61, 134.89, 133.01, 129.82, 126.74, 125.82, 121.75, 120.80, 116.35, 115.06, 41.93, 20.37. MS (ESI) for C24H18N4O3 [M + H]+, calcd: 411.0883, found: 411.0884.

**Figure S1**. Mass spectrum of compound 2a.





**Figure S2.** IR spectrum of compound 2a

**
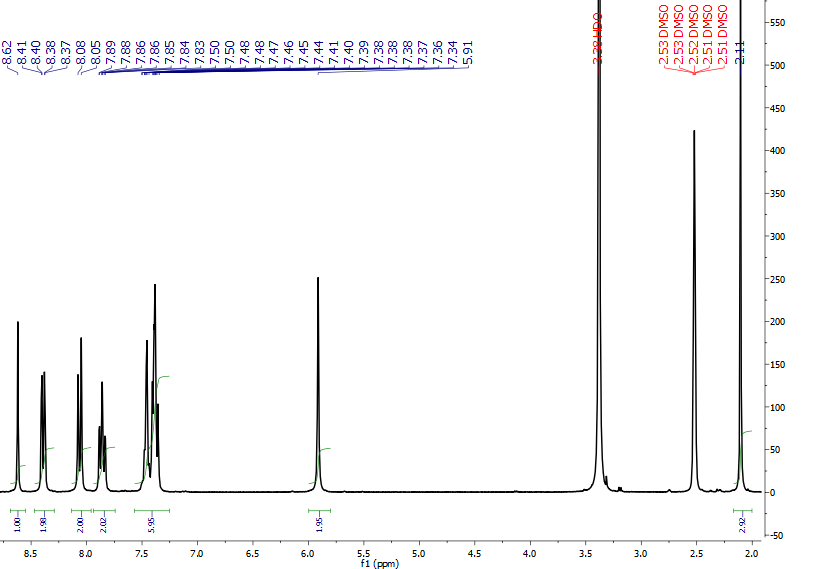
**

**Figure S3**. 1H-NMR spectrum of compound 2a.


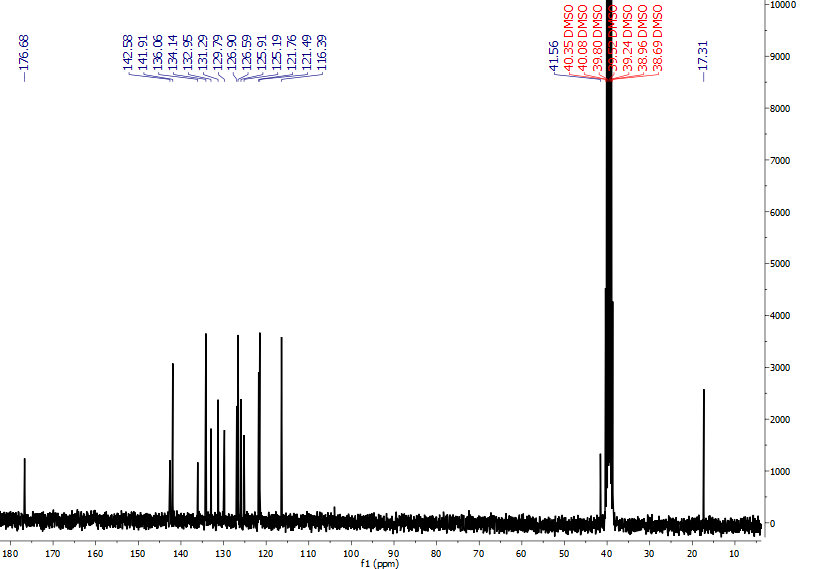


**Figure S4**. 13C-NMR spectrum of compound 2a.


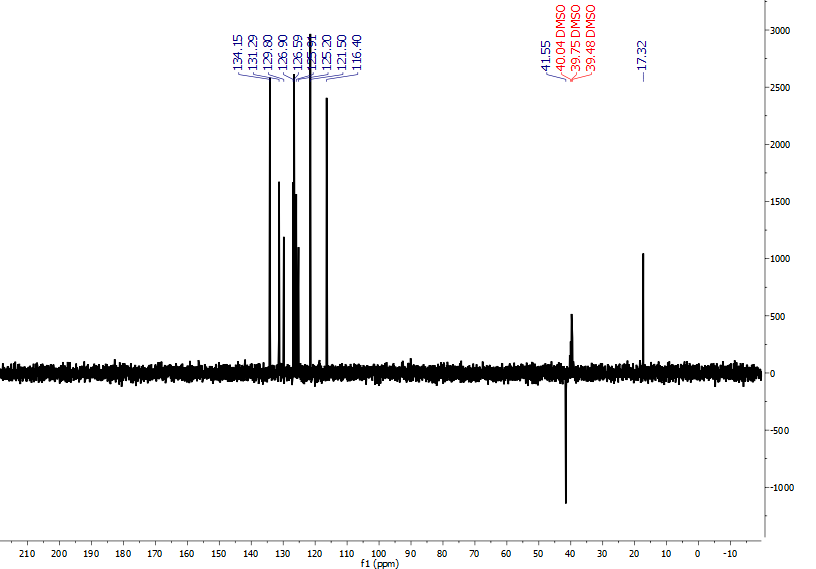


**Figure S5**. 13C-NMR DEPT135 spectrum of compound 2a.

**Figure S6**. Mass spectrum of compound 2b.





**Figure S7.** IR spectrum of compound 2b


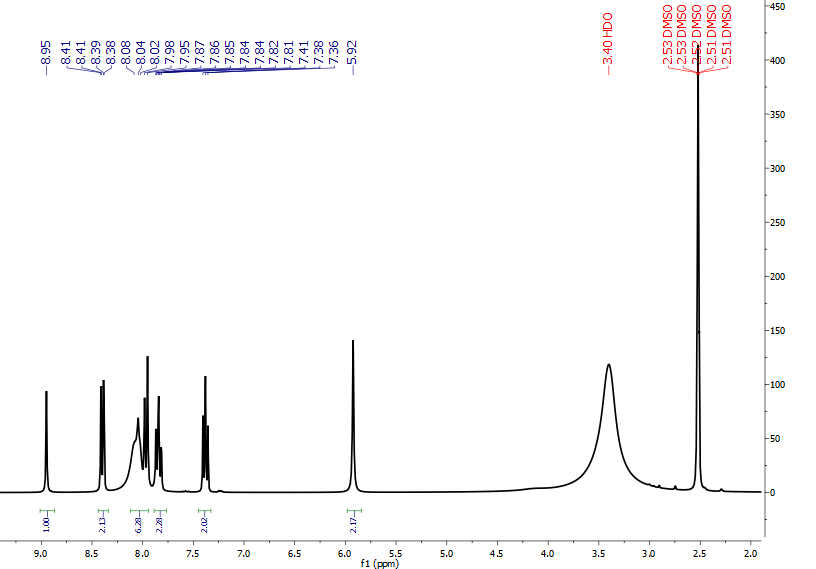


**Figure S8**. 1H-NMR spectrum of compound 2b.


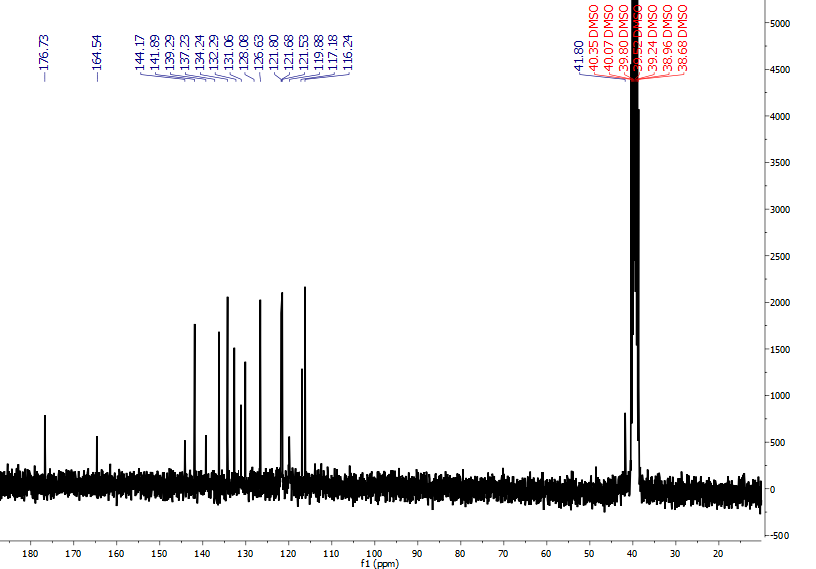


**Figure S9**. 13C-NMR spectrum of compound 2b.


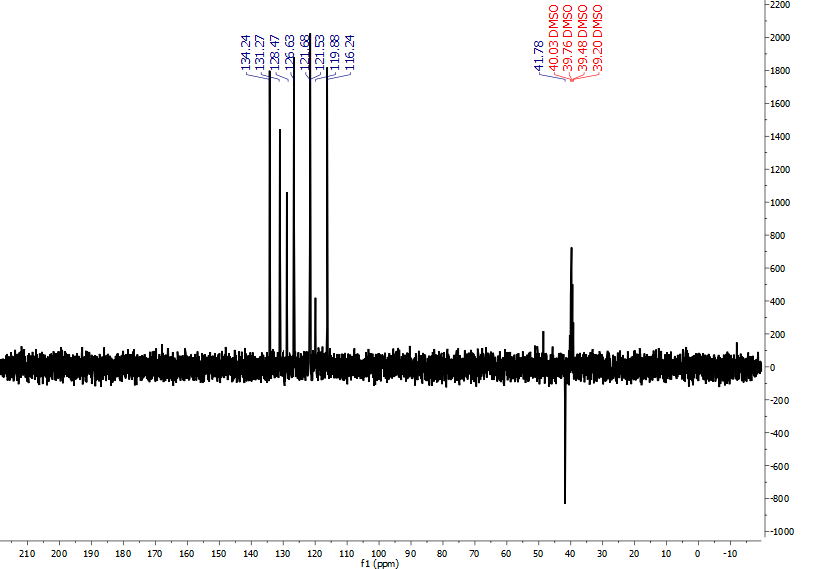


**Figure S10**. 13C-NMR DEPT 135 spectrum of compound 2b

**Figure S11**. Mass spectrum of compound 2c.





**Figure S12.** IR spectrum of compound 2c


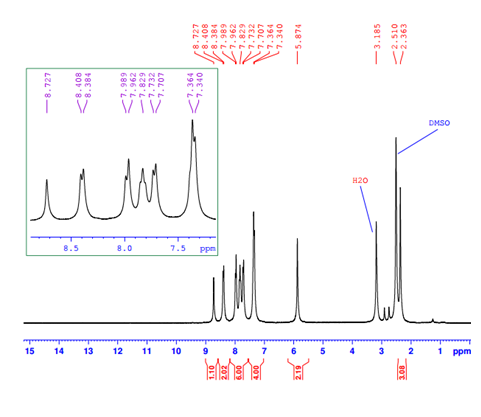


**Figure S13**. 1H-NMR spectrum of compound 2c.


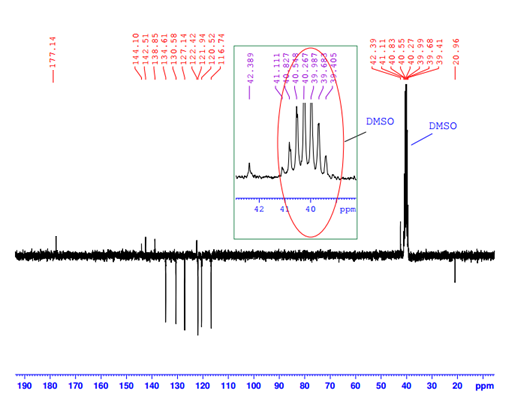


**Figure S14**. 13C-NMR spectrum of compound 2c.


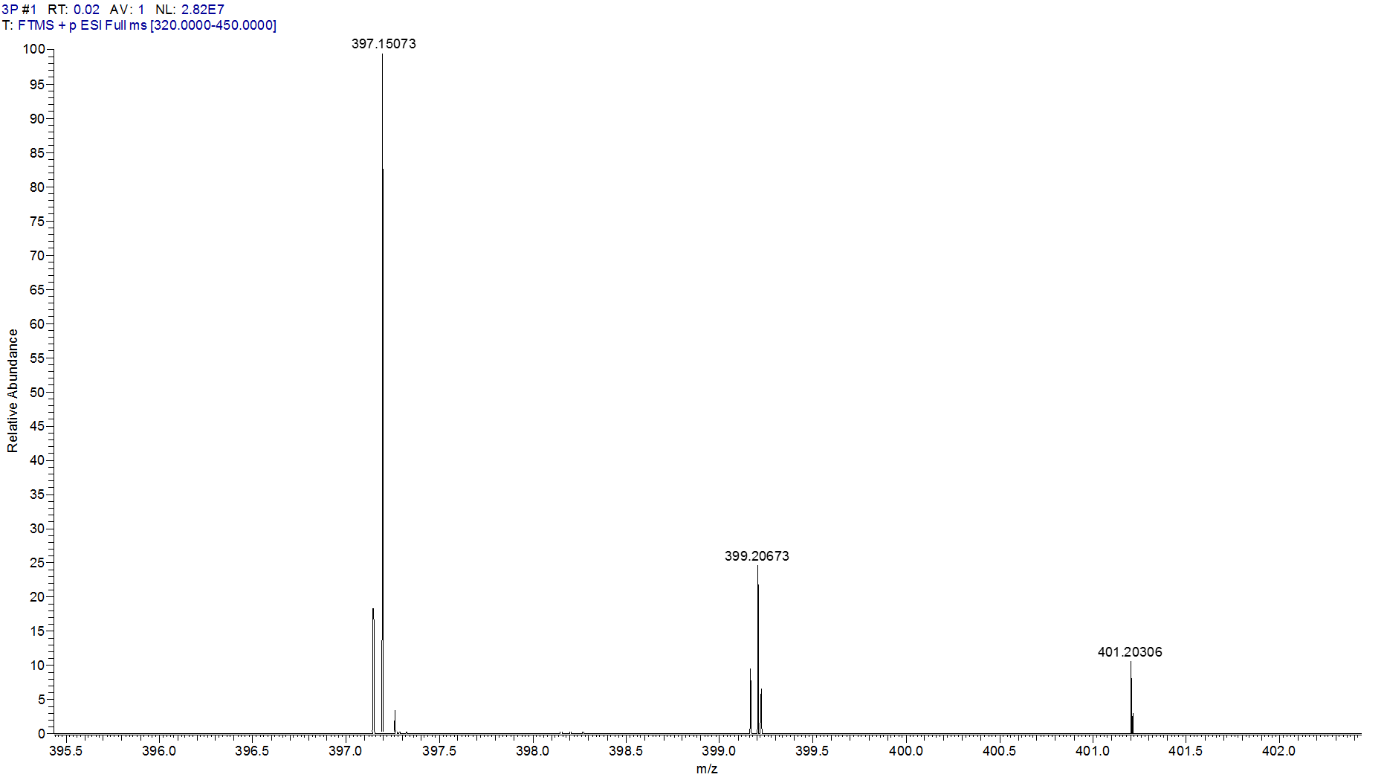
**Figure S15**. Mass spectrum of compound 2d.





**Figure S16.** IR spectrum of compound 2d


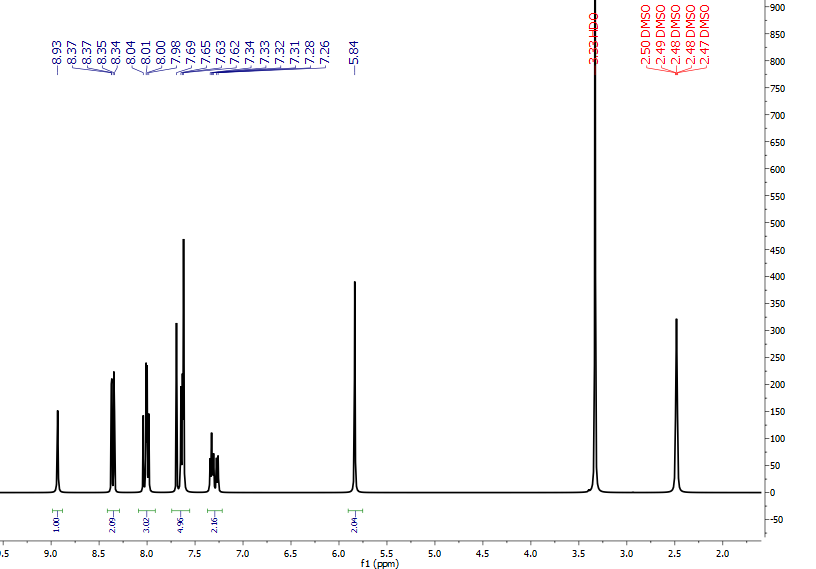


**Figure S17**. 1H-NMR spectrum of compound 2d.


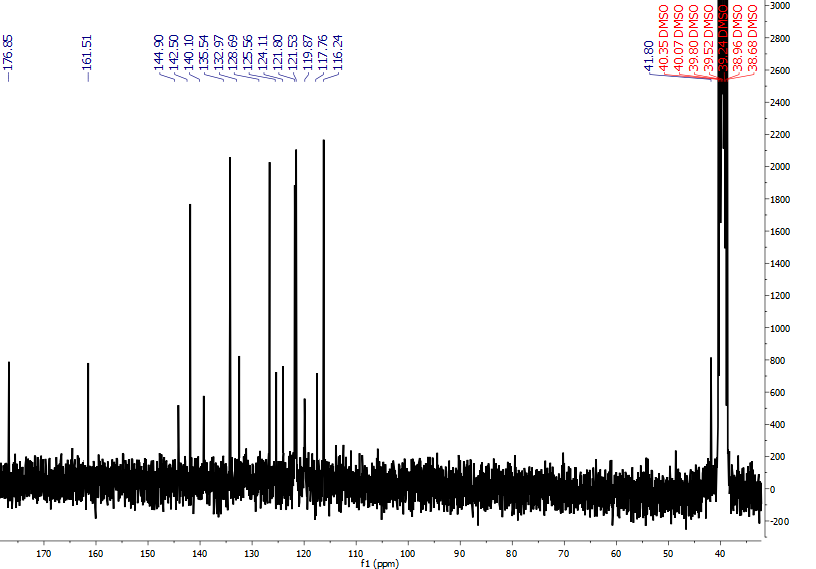


**Figure S18**. 13C-NMR spectrum of compound 2d.


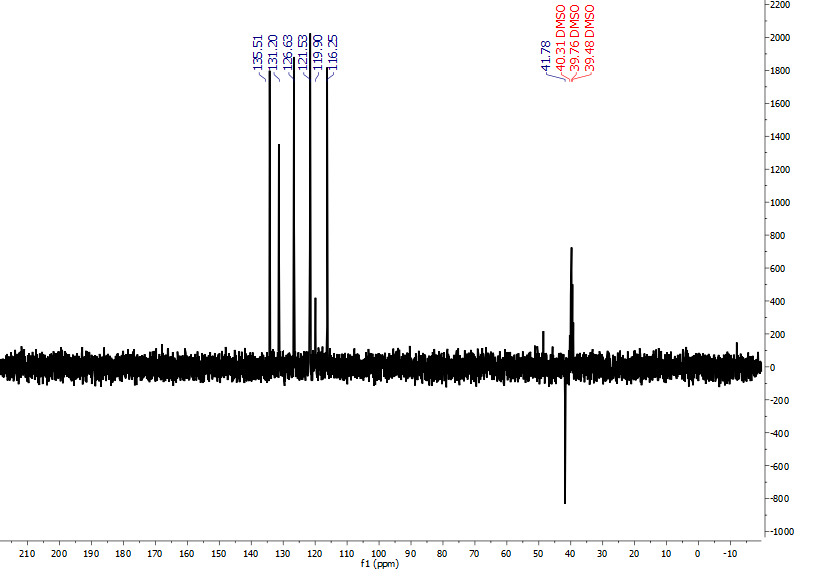


**Figure S19**. 13C-NMR DEPT 135 spectrum of compound 2d

**Figure S20**. Mass spectrum of compound 2e





**Figure S21.** IR spectrum of compound 2e


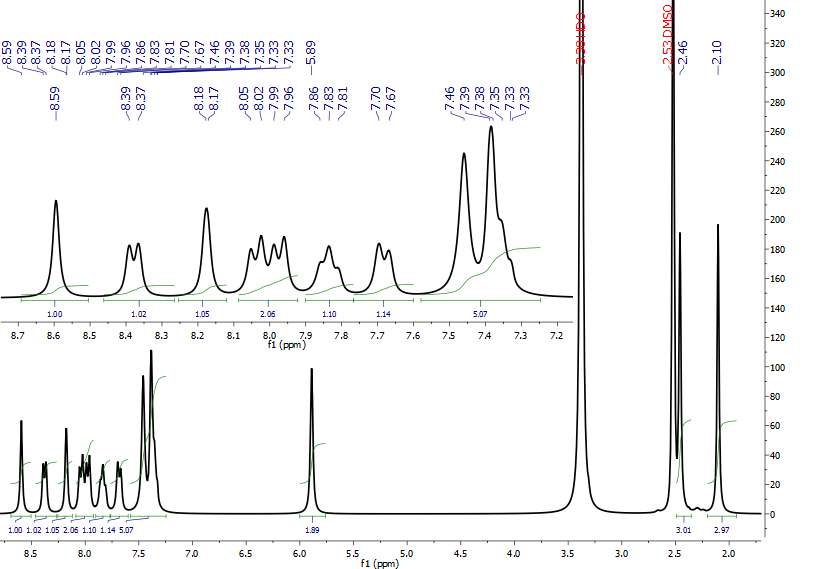


**Figure S22**. 1H-NMR spectrum of compound 2e.


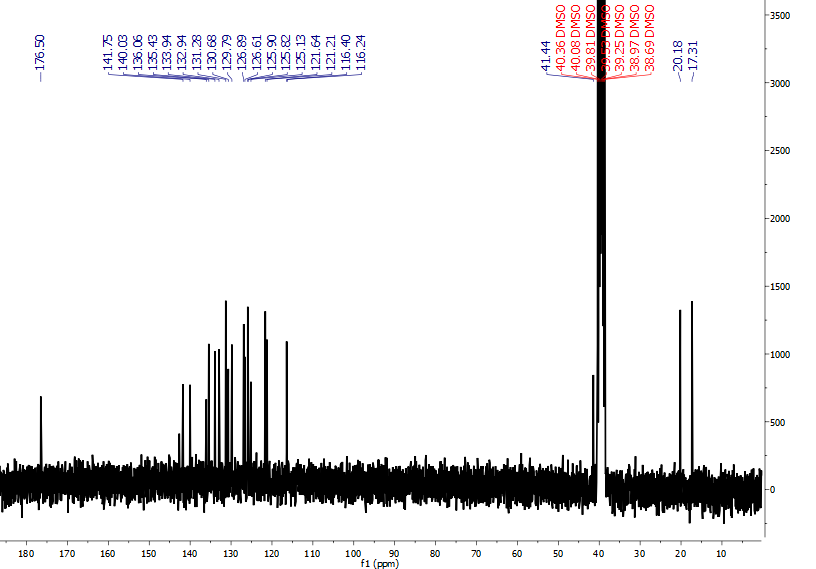


**Figure S23**. 13C-NMR spectrum of compound 2e.


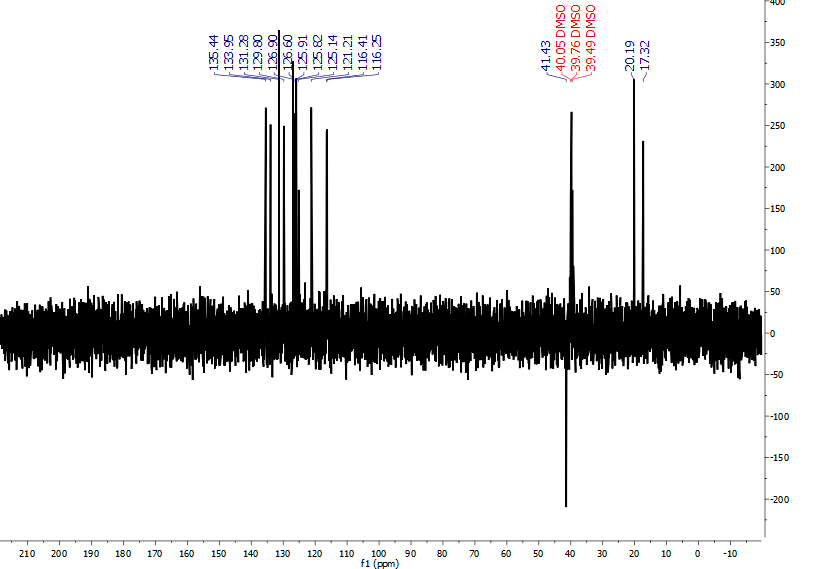


**Figure S24**. 13C-NMR DEPT 135 spectrum of compound 2e


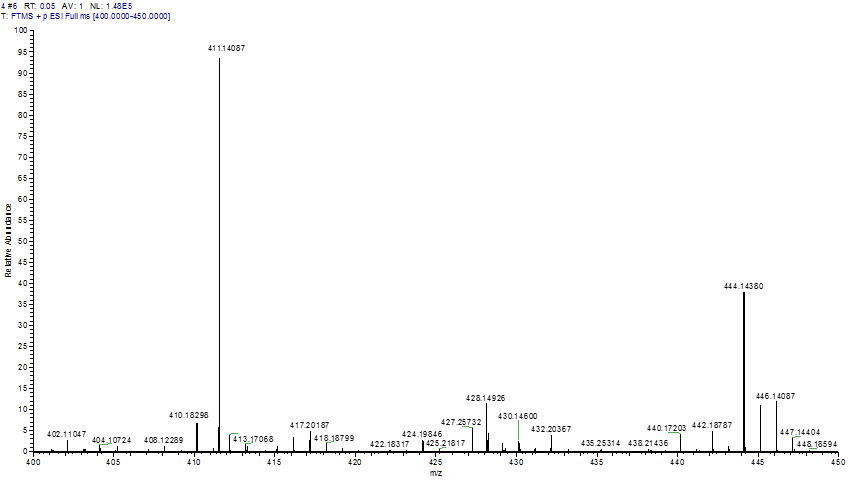
**Figure S25**. Mass spectrum of compound 2f





**Figure S26.** IR spectrum of compound 2f


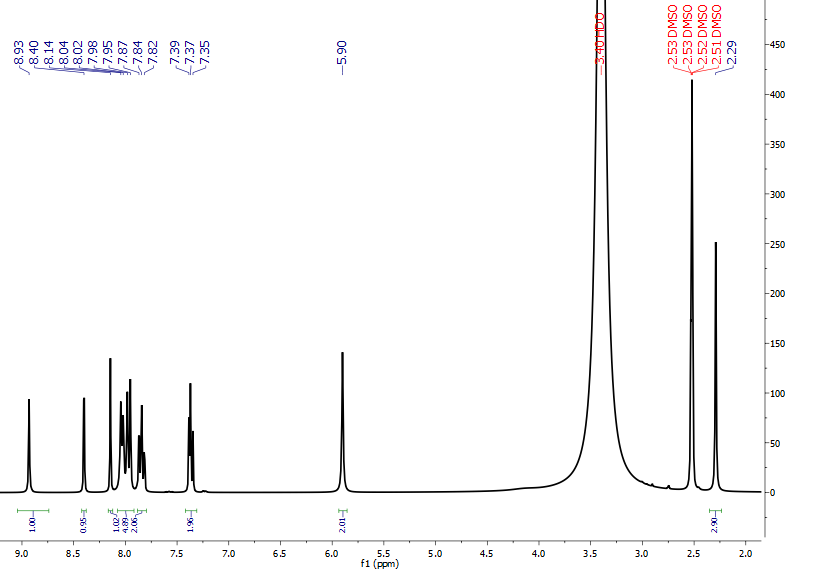


**Figure S27**. 1H-NMR spectrum of compound 2f.


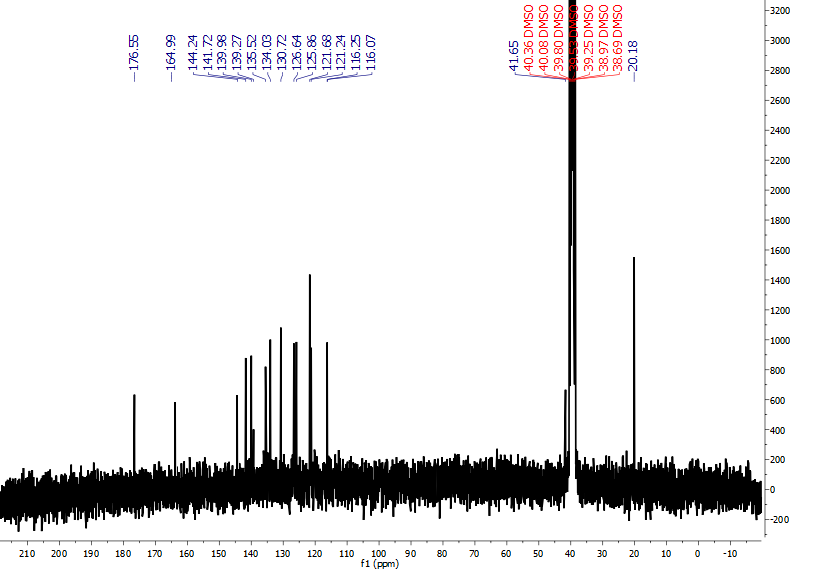


**Figure S28**. 13C-NMR spectrum of compound 2f.


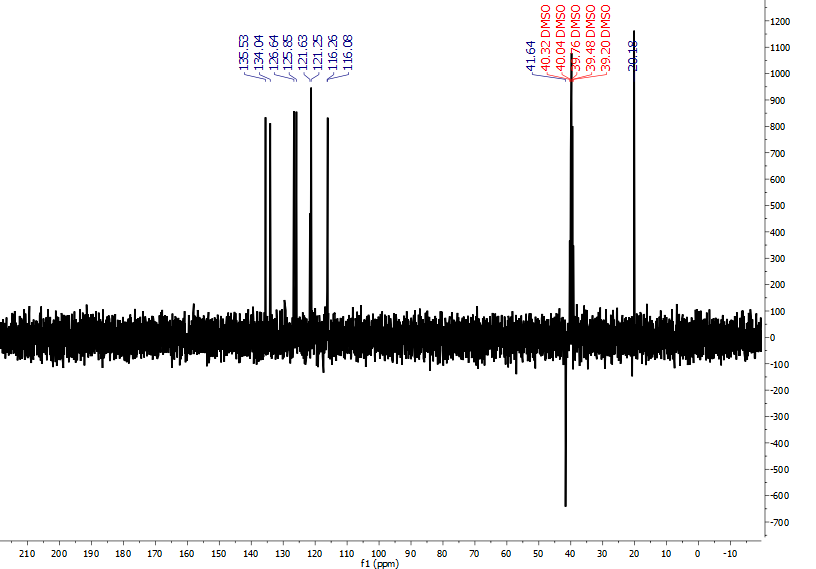


**Figure S29**. 13C-NMR DEPT 135 spectrum of compound 2f

**Figure S30**. Mass spectrum of compound 2g





**Figure S31.** IR spectrum of compound 2g


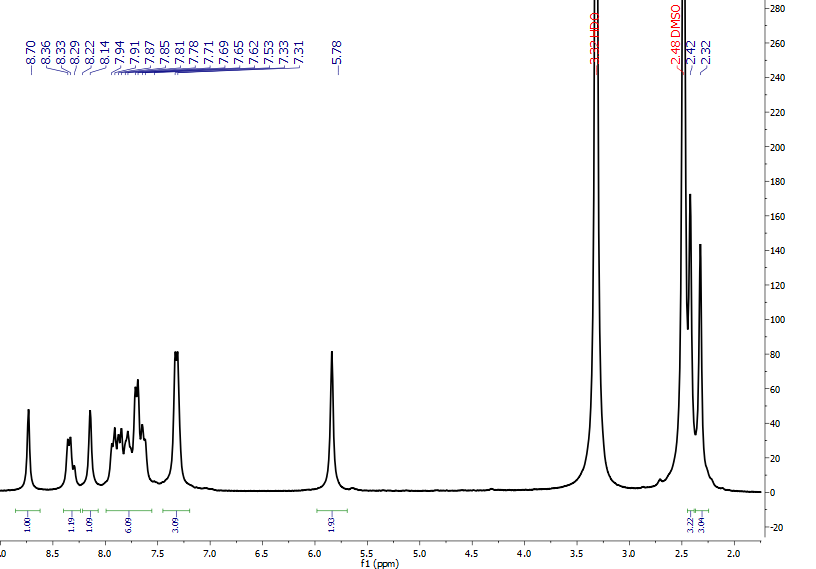


**Figure S32**. 1H-NMR spectrum of compound 2g.


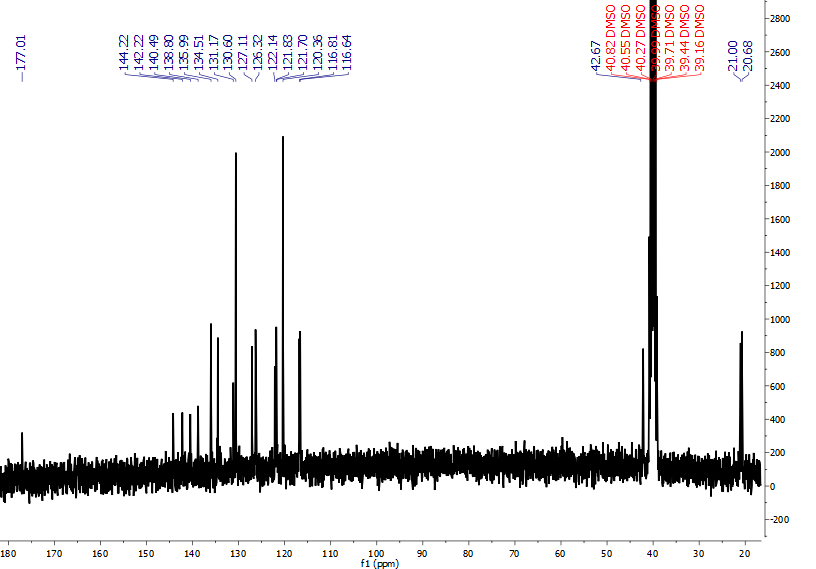


**Figure S33**. 13C-NMR spectrum of compound 2g.


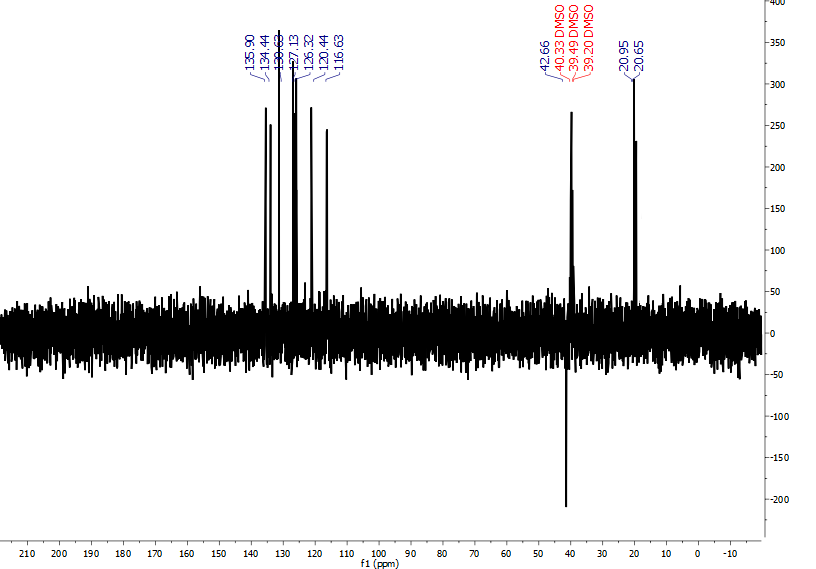


**Figure S34**. 13C-NMR DEPT 135 spectrum of compound 2g


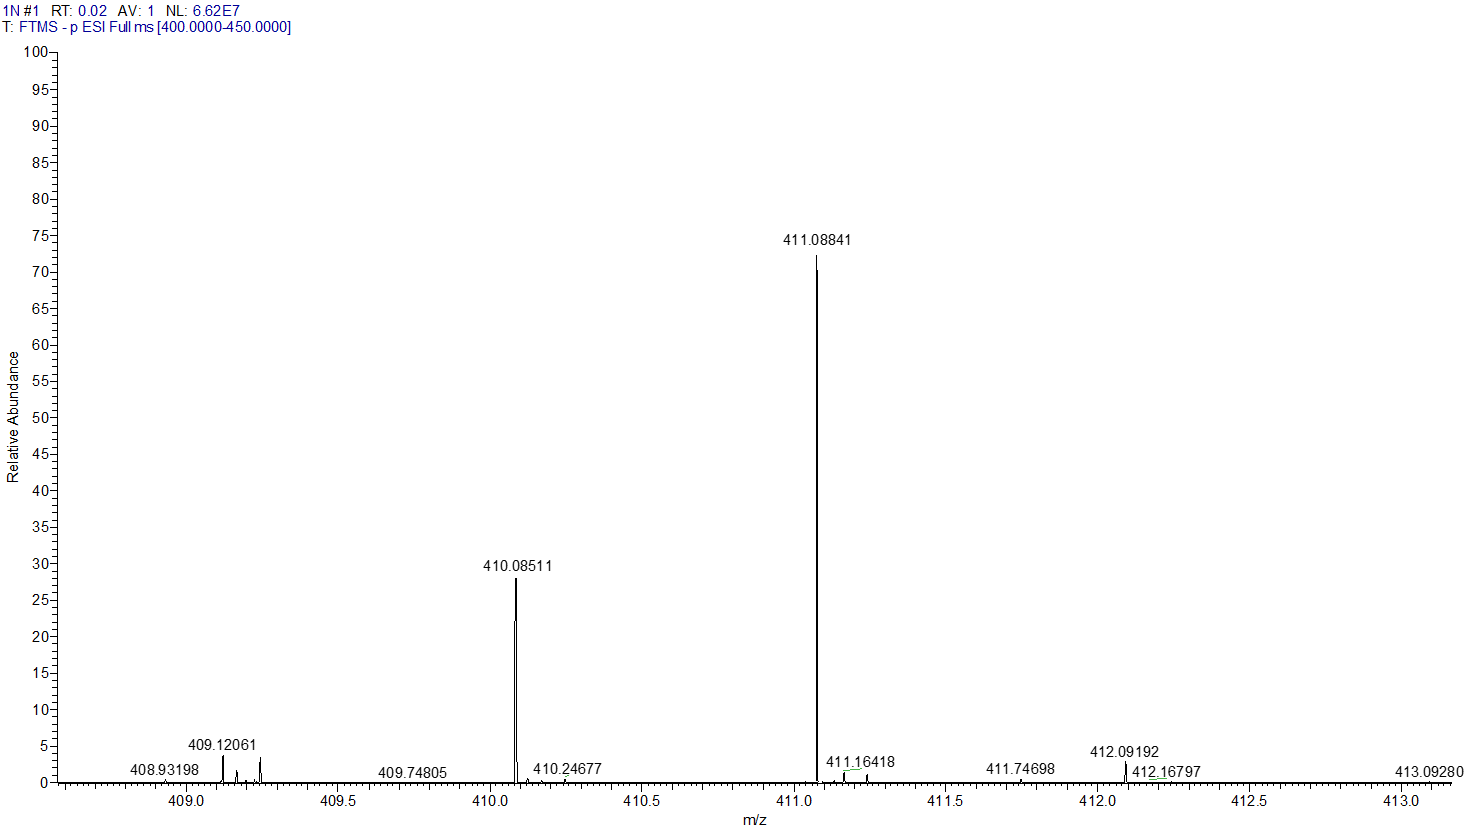
**Figure S35**. Mass spectrum of compound 2h





**Figure S36.** IR spectrum of compound 2h


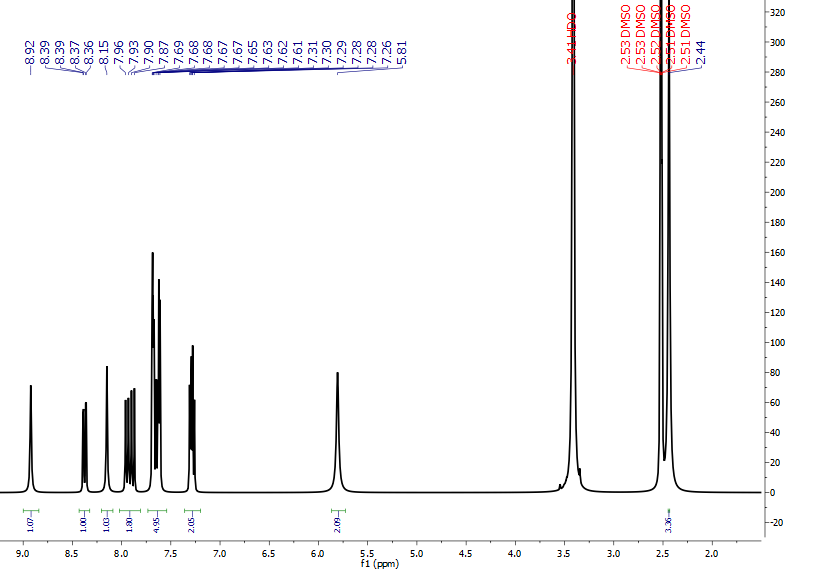


**Figure S37**. 1H-NMR spectrum of compound 2h.


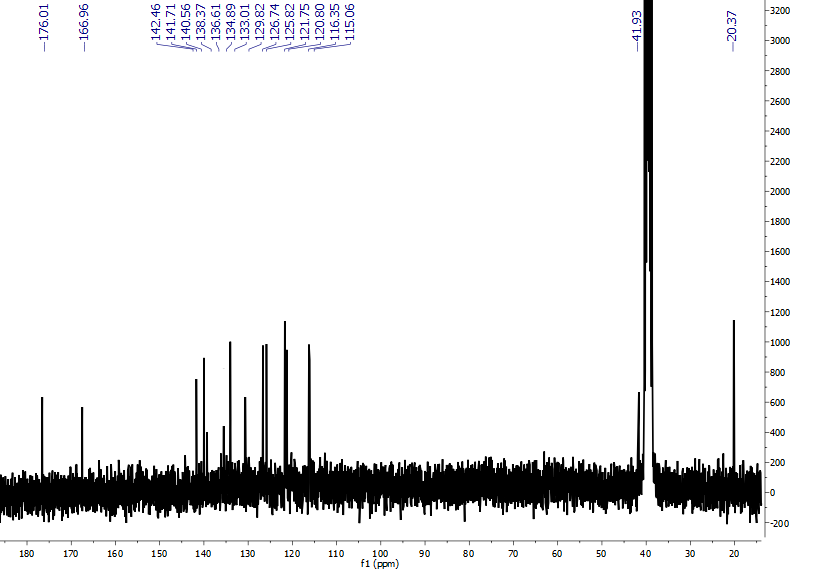


**Figure S38**. 13C-NMR spectrum of compound 2h.


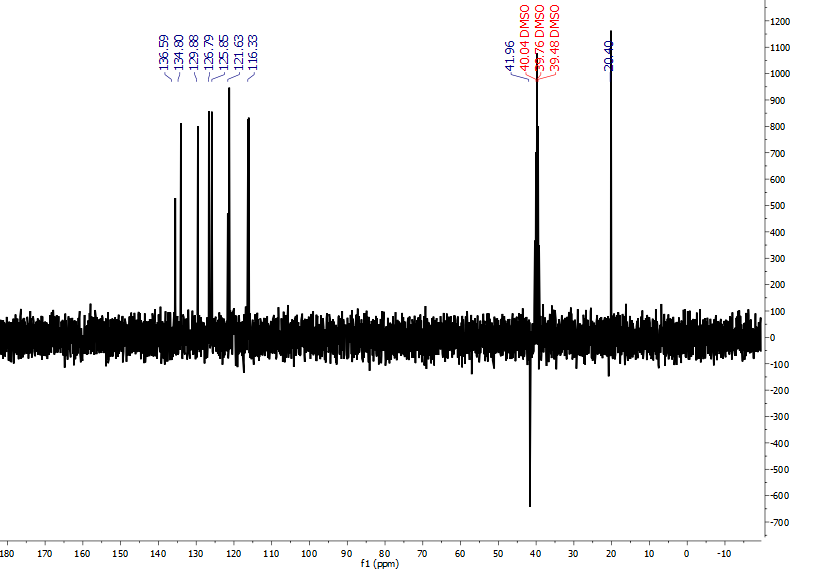


**Figure S39**. 13C-NMR DEPT 135 spectrum of compound 2h
